# Supplementary material
Source: ML conference proceedings conference paper supplement (https://openaccess.thecvf.com/content/CVPR2026/html/Yang_Gravitation-Driven_Semantic_Alignment_CVPR_2026_paper.html)
Supplement: Supplementary file 1 [file Yang_Gravitation-Driven_Semantic_Alignment_CVPR_2026_supplemental.pdf]

# Gravitation-Driven Semantic Alignment for Text Video Retrieval

## Supplementary Material

### 7. From an Entangled Integral to Decoupled Factors: The Evolution of GraviAlign

Our approach to multimodal similarity originates from a profound physical intuition: semantic similarity is not a mere geometric distance but a dynamic interaction between two "probability clouds," each laden with uncertainty. This is the genesis of our **Semantic Gravitational Interaction (SGI)** model. The initial formulation is captured by the SGI integral:

$$I_{\text{SGI}} = \iint p_v(x)p_t(y) \cdot \exp\left(\frac{S(x,y)}{T}\right) dx dy, \quad (11)$$

where  $p_v(x)$  and  $p_t(y)$  represent the probability distributions of the video and text semantics, and  $S(x,y)$  is an interaction term inspired by gravitational potential, modulated by a temperature  $T$  via a Boltzmann-like weight.

However, the elegance of this formulation comes with a challenge: it is a computationally intractable entangled integral. The distributions and the interaction term are deeply coupled, precluding a closed-form solution. This impasse led us to a core insight: the SGI integral implicitly captures two distinct, orthogonal aspects of similarity:

1. **Geometric Overlap** ( $\Psi_{\text{Overlap}}$ ): This factor measures the degree to which the two distributions intersect in the embedding space, reflecting a static, geometric alignment.
2. **Semantic Attraction** ( $\Phi_{\text{Attraction}}$ ): This component models the attractive potential energy between the semantic 'centers of mass' (centroids) of the two distributions, reflecting a dynamic, potential-based alignment.

Our key methodological leap was to decouple these two fundamental factors. This led to our novel **GraviAlign Dual-Factor** framework, where the total alignment score is conceptualized in the log-domain as a sum of the two factors. This directly corresponds to the additive form  $S_{\text{align}} = A + B + C$  used in our main paper, where Semantic Attraction is captured by Term A, and Geometric Overlap is jointly represented by Term B and Term C.

### 8. Theoretical Justification for the Geometric Score (Term B and Term C)

The geometric part of our alignment score, composed of Term B and Term C, is not an ad-hoc choice but a principled measure of alignment that emerges naturally from multiple theoretical perspectives, which we detail below.

### 8.1. Perspective 1: Zero-Difference Likelihood

A strong alignment implies that the random difference vector  $Z_{\text{diff}} = Z_v - Z_t$  is highly likely to be zero. Let  $Z_v \sim \mathcal{N}(\mu_v, \Sigma_v)$  and  $Z_t \sim \mathcal{N}(\mu_t, \Sigma_t)$  be independent Gaussian embeddings. Their difference is also a Gaussian. For brevity, let  $\Delta\mu = \mu_v - \mu_t$ . Then:

$$Z_{\text{diff}} \sim \mathcal{N}(\Delta\mu, \Sigma_v + \Sigma_t) = \mathcal{N}(\Delta\mu, \Sigma_{\text{joint}}). \quad (12)$$

The probability density function (PDF) of a general multivariate Gaussian  $z \sim \mathcal{N}(\mu, \Sigma)$  is:

$$p(z) = \frac{1}{\sqrt{(2\pi)^D |\Sigma|}} \exp\left(-\frac{1}{2}(z - \mu)^\top \Sigma^{-1}(z - \mu)\right) \quad (13)$$

We evaluate this PDF for  $Z_{\text{diff}}$  at the point  $z = 0$ . The quadratic form in the exponent becomes  $(-\Delta\mu)^\top \Sigma_{\text{joint}}^{-1}(-\Delta\mu) = \Delta\mu^\top \Sigma_{\text{joint}}^{-1} \Delta\mu$ . Thus:

$$p(Z_{\text{diff}} = 0) = \frac{1}{\sqrt{(2\pi)^D |\Sigma_{\text{joint}}|}} \exp\left(-\frac{1}{2} \Delta\mu^\top \Sigma_{\text{joint}}^{-1} \Delta\mu\right) \quad (14)$$

Taking the logarithm gives us the log-likelihood:

$$\begin{aligned} \log p &= -\frac{1}{2} \log((2\pi)^D |\Sigma_{\text{joint}}|) - \frac{1}{2} \Delta\mu^\top \Sigma_{\text{joint}}^{-1} \Delta\mu \\ &= -\frac{1}{2} \Delta\mu^\top \Sigma_{\text{joint}}^{-1} \Delta\mu - \frac{1}{2} \log |\Sigma_{\text{joint}}| - \frac{D}{2} \log(2\pi). \end{aligned} \quad (15)$$

Ignoring the constant term, the two remaining components correspond exactly to Term B and Term C, respectively.

### 8.2. Perspective 2: Direct Geometric Overlap

This perspective directly measures the volume of intersection between the two PDFs via the overlap integral,  $\Psi_{\text{Overlap}}$ . For two Gaussian distributions, this integral has a known closed-form solution:

$$\Psi = \int_{\mathbb{R}^D} p_v(x)p_t(x) dx = \mathcal{N}(\mu_v | \mu_t, \Sigma_v + \Sigma_t). \quad (16)$$

Using the same notation  $\Delta\mu = \mu_v - \mu_t$ , evaluating the PDF and taking the logarithm yields:

$$\begin{aligned} \log \Psi &= \log(\mathcal{N}(\mu_v | \mu_t, \Sigma_{\text{joint}})) \\ &= -\frac{1}{2} \log((2\pi)^D |\Sigma_{\text{joint}}|) - \frac{1}{2} \Delta\mu^\top \Sigma_{\text{joint}}^{-1} \Delta\mu \\ &= -\frac{1}{2} \Delta\mu^\top \Sigma_{\text{joint}}^{-1} \Delta\mu - \frac{1}{2} \log |\Sigma_{\text{joint}}| - \frac{D}{2} \log(2\pi). \end{aligned} \quad (17)$$

Again, this expression is equivalent to the sum of Term B, Term C, and a constant.
